# Supplementary material
Source: publisher site journal article supplement (https://neotropical.pensoft.net/article/49166/download/suppl/31/)
Supplement: Supplementary file 1

**Table S1.** Priority and framework species for the Region of Palmito de Verde, state of Sinaloa, Mexico, with reproductive characteristics after RBG Kew (2008) and Benítez-Pardo et al. (2016, 2017, 2018). **Herb.** : U/H = duplicate herbarium samples at Universidad Autónoma de Sinaloa Herbario (-UAS-) and at Herbario Regional CIAD-Mazatlán (-HCIAD-), U = unicate sample deposited at –UAS-, **FOI-P** = Priority species according to floristic originality index (FOI) value, 1 = yes, 0 = no; **Nursery soil salinity**: UN = unsalted, BR = brackish; **Type** : C = climax species, P = pioneer species; **Optimal soil type**: soil typology after INEGI 2014, E = eroded; ND = not documented; NE = non eroded.

| **Family** | **Species** | **Herb.** | **FOI-P** | **Multiplication** | **Nursery salinity** | **Type** | **Optimal soil type(s)** |
| --- | --- | --- | --- | --- | --- | --- | --- |
| Acanthaceae | *Avicennia germinans* | - | 0 | Ripe viviparous fruits, picked or fallen | BR | P + C | NE SCglsoh |
| Annonaceae | *Annona glabra* | U – FAC476  H – FAC478 | 1 | Juveniles collected near adult trees | UN + BR | C | NE SCglsoh |
| Arecaceae | *Attalea guacuyule* | U – FAC270 | 1 | Juvenile with cotyledon leaves 40-50 cm under adult palm trees | UN | C / canopy | NE ARszwgl+RGszwgl/1 |
| Bignoniaceae | *Crescentia alata* | - | 0 | Seeds (orthodox) | UN | C | NE ARszwgl+RGszwgl/1 or SCglsoh |
|  | *Handroanthus chrysanthus* | U – FAC420  H – FAC422 | 0 | Seeds (orthodox) with heat treatment | UN | C | NE CMeulep+LVlep/2 |
|  | *Handroanthus impetiginosus* | H – FAC423 | 0 | Seeds (orthodox) with heat treatment | UN | C | NE CMeulep+LVlep/2 |
| Bixaceae | *Cochlospermum vitifolium* | - | 0 | Seeds (orthodox) with heat treatment | UN | P + C | E or NE CMeulep+LVlep/2 or ARszwgl+RGszwgl/1 |
| Boraginaceae | *Bourreria superba* var*. superba* | U – FAC011  H – FAC012 | 1 | Cutting | UN | C | NE ARszwgl+RGszwgl/1 |
| Burseraceae | *Bursera palmeri* | U – FAC397  H – FAC399 | 1 | ND | UN | P + C | NE CMeulep+LVlep/2 |
|  | *Bursera simaruba* | - | 1 | Cutting, seeds (orthodox) | UN | C | E or NE ARszwgl+RGszwgl /1 & CMeulep+LVlep/2 |
| Cactaceae | *Acanthocereus occidentalis* | - | 1 | Cuttings | UN | P | E & NE ARszwgl+RGszwgl/1 on dunes & SCglsoh |
|  | *Pilosocereus purpusii* | - | 1 | Cuttings | UN | C | E or NE CMeulep+LVlep/2 |
|  | *Stenocereus alamosensis* | - | 1 | Cuttings | UN | P + C | E & NE ARszwgl+RGszwgl/1 on dunes |
| Cannabaceae | *Aphananthe monoica* | - | 1 | ND | UN + BR | C | NE SCglsoh |
| Capparaceae | *Crateva tapia* | U – FAC286  H – FAC287 | 0 | Cuttings | UN | C | E or NE ARszwgl+RGszwgl/1 or Scglsoh |
| Chrysobalanaceae | *Couepia polyandra* | U – FAC384  H – FAC386 | 1 | Juveniles collected near adult trees | UN | C | NE CMeulep+LVlep/2 |
| Combretaceae | *Conocarpus erectus* | - | 0 | Cuttings, seeds (orthodox) | BR | P + C | NE SCglsoh |
|  | *Laguncularia racemosa* | - | 0 | Ripe viviparous fruits, picked or fallen | BR | P + C | E or NE SCglsoh |
| Connaraceae | *Rourea glabra* | U – FAC198  H – FAC199 | 1 | ND | UN | C / canopy | NE ARszwgl+RGszwgl/1 |
| Convolvulaceae | *Ipomoea arborescens* | - | 1 | Cuttings | UN | P + C | NE ARszwgl+RGszwgl/1 |
| Ebenaceae | *Diospyros salicifolia* | U – FAC127  H – FAC129 | 1 | Unsuccessful with cuttings or seeds | UN | C | E or NE ARszwgl+RGszwgl/1 on dune |
|  | *Diospyros sphaerantha* | U – FAC210  H – FAC213 | 1 | Seeds | UN | C | NE ARszwgl+RGszwgl/1 on dune |
| Erythroxylaceae | *Erythroxylum havanense* | U – FAC590  H – FAC591 | 1 | ND | UN | C | E or NE ARszwgl+RGszwgl/1 |
| Euphorbiaceae | *Enriquebeltrania disjuncta* | U – FAC156  H – FAC159 | 1 | ND | UN | C | E or NE ARszwgl+RGszwgl/1 on dunes |
|  | *Hura polyandra* | - | 1 | Seeds | UN | C | NE ARszwgl+RGszwgl/1 |
|  | *Jatropha curcas* | U – FAC570  H – FAC571 | 1 | Cuttings, seeds (orthodox) | UN | P + C | NE ARszwgl+RGszwgl/1 on dunes |
|  | *Jatropha sympetala* | U – FAC332  H – FAC334 | 1 | Cuttings | UN | P + C | E or NE ARszwgl+RGszwgl/1 on dunes |
| Fabaceae | *Albizia occidentalis* var. *occidentalis* | U – FAC264  H – FAC267 | 1 | Seed | UN | P + C | NE CMeulep+LVlep/2 & Scglsoh |
|  | *Albizia tomentosa* | U – FAC017  H – FAC020 | 0 | Seeds with heat treatment | UN | P + C | NE CMeulep+LVlep/2 & Scglsoh |
|  | *Calliandra tergemina* | U – FAC403  H – FAC404 | 1 | ND | UN | C | NE CMeulep+LVlep/2 |
|  | *Coulteria platyloba* | - | 1 | Seeds with heat treatment | UN | P + C | E or NE ARszwgl+RGszwgl/1 |
|  | *Enterolobium cyclocarpum* | - | 1 | Seeds (orthodox) with heat treatment | UN | C | NE ARszwgl+RGszwgl/1 |
|  | *Gliricidia sepium* | U – FAC214 | 0 | Seeds (orthodox) with heat treatment | UN | P + C | E or NE ARszwgl+RGszwgl/1 |
|  | *Guilandina bonduc* | U – FAC531 | 0 | Seeds with heat treatment (success < 10%) | UN | P | E or NE ARszwgl+RGszwgl/1 on dune |
|  | *Haematoxylum brasiletto* | U – FAC219 | 1 | Seeds with heat treatment | UN | C | NE ARszwgl+RGszwgl/1 |
|  | *Indigofera suffruticosa* | U – FAC220  H – FAC224 | 1 | Seeds (orthodox) | UN | P | NE ARszwgl+RGszwgl/1 |
|  | *Leucaena leucocephala* | - | 0 | Seeds (orthodox) with heat treatment | UN | P | E ARszwgl+RGszwgl/1 |
|  | *Lonchocarpus mutans* | U – FAC227  H – FAC233 | 1 | ND | UN | C | NE CMeulep+LVlep/2 |
|  | *Lonchocarpus sericeus* subsp*. palmeri* | U – FAC246  H – FAC248 | 1 | Cuttings | UN | C | NE ARszwgl+RGszwgl/1 |
|  | *Pithecellobium dulce* | U – FAC116  H – FAC118 | 0 | Seeds (orthodox) | UN | P | E or NE ARszwgl+RGszwgl/1 |
|  | *Prosopis juliflora* | U – FAC001  H – FAC003 | 0 | Seeds (orthodox) with heat treatment (seedling success below 10%) | UN | P | E or NE ARszwgl+RGszwgl/1 or SCglsoh |
|  | *Senna fruticosa* | U – FAC047  H – FAC049 | 1 | ND | UN | C | NE ARszwgl+RGszwgl/1 |
| Lamiaceae | *Vitex mollis* | U – FAC474  H – FAC475 | 0 | Cuttings | UN | P | E or NE ARszwgl+RGszwgl/1 on dunes |
| Malvaceae | *Ceiba aesculifolia* | - | 1 | Seeds (orthodox) | UN | C | NE CMeulep+LVlep/2 |
|  | *Ceiba pentandra* | U – FAC216  H – FAC218 | 1 | Seeds (orthodox) | UN | C | E or NE ARszwgl+RGszwgl/1 |
|  | *Guazuma ulmifolia* | U – FAC259  H – FAC258 | 0 | Cuttings, seeds (orthodox) | UN | P + C | E or NE ARszwgl+RGszwgl/1 or CMeulep+LVlep/2 |
|  | *Luehea candida* | - | 0 | Seeds | UN | P + C | E & NE CMeulep+LVlep/2 |
| Marantaceae | *Thalia geniculata* | - | 0 | Plants collected in fresh water bodies | UN | P | Fresh water bodies around RPV |
| Meliaceae | *Cedrela odorata* | - | 1 | Seeds (orthodox) | UN | P + C | E or NE ARszwgl+RGszwgl/1 |
|  | *Swietenia humilis* | U – FAC225  H – FAC226 | 1 | Plants collected near adult trees. Seeds (orthodox) | UN | ND | E & NE ARszwgl+RGszwgl/1 on dunes |
| Moraceae | *Ficus cotinifolia* | - | 1 | Seeds (orthodox) | UN | C | E or NE ARszwgl+RGszwgl/1 or CMeulep+LVlep/2 |
|  | *Ficus crocata* | - | 1 | ND | UN | C | E or NE ARszwgl+RGszwgl/1 |
|  | *Ficus obtusifolia* | U – FAC073  H – FAC075 | 1 | Seeds (orthodox) | UN | C / usually associated with *Attalea guacuyule* | E or NE ARszwgl+RGszwgl/1 or CMeulep+LVlep/2 |
|  | *Ficus padifolia* | U – FAC080  H – FAC083 | 1 | Juveniles collected near adult trees. | UN | C / usually associated with *Attalea guacuyule* | E or NE ARszwgl+RGszwgl/1 or CMeulep+LVlep/2 |
|  | *Ficus petiolaris* subsp*. petiolaris* | U – FAC642  H – FAC643 | 1 | ND | UN | C / usually associated with *Attalea guacuyule* | E or NE CMeulep+LVlep/2 or ARszwgl+RGszwgl/1 |
| Myrtaceae | *Eugenia acapulcensis* | U – FAC337  H – FAC336 | 1 | Juveniles collected under adult trees. | UN | C | E or NE ARszwgl+RGszwgl/1 or Scglsoh |
| Nymphaeaceae | *Nymphaea elegans* | - | 1 | Plants collected in fresh water bodies | UN | C | Fresh water bodies around RPV |
| Opiliaceae | *Agonandra racemosa* | U – FAC205  H – FAC207 | 1 | ND | UN | C / canopy | NE ARszwgl+RGszwgl/1 |
| Polygonaceae | *Coccoloba barbadensis* | U – FAC023  H – FAC025 | 0 | Cuttings | UN | P + C | E or NE ARszwgl+RGszwgl/1 |
| Rhamnaceae | *Ziziphus amole* | - | 1 | Seeds | UN | C | NE SCglsoh |
| Rhizophoraceae | *Rhizophora mangle* | - | 0 | Ripe viviparous fruits, picked or fallen | BR | P + C | E or NE SCglsoh |
| Rubiaceae | *Diodella crassifolia* | U – FAC121  H – FAC123 | 1 | Cuttings | UN | P | E or NE ARszwgl+RGszwgl/1 on dunes |
|  | *Exostema mexicanum* | - | 1 | ND | UN | C | E or NE CMeulep+LVlep/2 |
|  | *Hintonia latiflora* | - | 1 | Unsuccessful with cuttings or seeds | UN | C | NE ARszwgl+RGszwgl/1 |
| Rutaceae | *Zanthoxylum caribaeum* | U – FAC183  H – FAC185 | 1 | ND | UN | C | NE ARszwgl+RGszwgl/1 on dunes |
|  | *Zanthoxylum fagara* | - | 1 | ND | UN | C | NE CMeulep+LVlep/2 |
| Salicaceae | *Casearia nitida* | U – FAC326 | 0 | Seeds | UN | P | E or NE ARszwgl+RGszwgl/1 |
|  | *Salix nigra* | - | 0 | Plants collected on Baluarte River banks | UN | P + C | NE PHsowszw |
| Sapindaceae | *Cupania dentata* | U – FAC374  H – FAC376 | 1 | Juveniles collected under adult trees. Seeds (recalcitrant) | UN | C / canopy | NE CMeulep+LVlep/2 |
|  | *Sapindus saponaria* | U – FAC005  H – FAC008 | 0 | Plants collected near adult trees. Seeds with uncertain storage ability (RBG Kew, 2008) | UN | P | E or NE ARszwgl+RGszwgl/1 |
|  | *Thouinidium decandrum* | U – FAC050  H – FAC053 | 1 | Juveniles collected under adult trees. Seeds (orthodox) | UN | C | NE CMeulep+LVlep/2 |
| Sapotaceae | *Sideroxylon capiri* |  | 1 | Seeds with heat treatment | UN (Garcia & Di Stefano, 2005) | C / canopy | NE ARszwgl+RGszwgl/1 |
|  | *Sideroxylon persimile* subsp*. subsessiliflorum* | U – FAC180  H – FAC182 | 1 | ND | UN | C | NE ARszwgl+RGszwgl/1 on dunes |
| Verbenaceae | *Citharexylum affine* | - | 1 | ND | UN | C / canopy | NE ARszwgl+RGszwgl/1 |

**Table S2.**  Inventory Floristic of the Region of Palmito de Verde, state of Sinaloa, Mexico.

| **Family** | **Species** |
| --- | --- |
| **Pteridaceae** | *Adiantum amplum* C. Presl |
| **Arecaceae** | *Attalea guacuyule* (Liebm. ex Mart.) Zona |
|  | *Cocos nucifera* L. |
|  | *Sabal rosei* (O.F. Cook) Becc. |
| **Bromeliaceae** | *Bromelia pinguin* L. |
|  | *Tillandsia exserta* Fernald |
| **Commelinaceae** | *Commelina erecta* L. |
| **Cyperaceae** | *Cyperus esculentus* L. |
|  | *Eleocharis elegans* (Kunth) Roem. & Schult. |
| **Poaceae** | *Cynodon dactylon* (L.) Pers. |
|  | *Dactyloctenium aegyptium* (L.) Willd. |
|  | *Jouvea pilosa* (J. Presl) Scribn. |
|  | *Lasiacis ruscifolia* (Kunth) Hitchc. |
|  | *Melinis repens* (Willd.) Zizka |
|  | *Muhlenbergia pectinata* C.O. Goodd. |
|  | *Uniola paniculata* L. |
|  | *Musa × paradisiaca* L. |
| **Typhaceae** | *Typha domingensis* Pers. |
| **Acanthaceae** | *Avicennia germinans* (L.) L. |
|  | *Carlowrightia arizonica* A. Gray |
|  | *Henrya insularis* Nees |
| **Aizoaceae** | *Sesuvium portulacastrum* (L.) L. |
| **Amaranthaceae** | *Amaranthus palmeri* S. Watson |
|  | *Gomphrena decumbens* Jacq. |
| **Anacardiaceae** | *Mangifera indica* L. |
| **Annonaceae** | *Annona glabra* L. |
| **Apiaceae** | *Eryngium* sp. |
| **Apocynaceae** | *Asclepias curassavica* L. |
|  | *Cascabela ovata* (Cav.) Lippold |
|  | *Plumeria rubra* L. |
|  | *Sarcostemma cynanchoides* Decne. |
|  | *Tabernaemontana amygdalifolia* Jacq. |
|  | *Tabernaemontana donnell-smithii* Rose |
| **Bataceae** | *Batis maritima* L. |
| **Bignoniaceae** | *Adenocalymma inundatum* Mart. ex DC. |
|  | *Amphilophium paniculatum* (L.) Kunth |
|  | *Crescentia alata* Kunth |
|  | *Handroanthus chrysanthus* (Jacq.) S.O. Grose |
|  | *Handroanthus impetiginosus* (Mart. ex DC.) Mattos |
|  | *Tabebuia rosea* (Bertol.) DC. |
| **Bixaceae** | *Cochlospermum vitifolium* (Willd.) Spreng. |
| **Boraginaceae** | *Bourreria superba* I. M. Johnst. var. *superba* |
|  | *Cordia alba* (Jacq.) Roem. & Schult. |
|  | *Heliotropium curassavicum* L. |
|  | *Tournefortia hirsutissima* L. |
| **Burseraceae** | *Bursera simaruba* (L.) Sarg. |
|  | *Bursera palmeri* S.Watson |
| **Cactaceae** | *Acanthocereus occidentalis* Britton & Rose |
|  | *Opuntia decumbens* Salm-Dyck |
|  | *Opuntia karwinskiana* Salm-Dyck |
|  | *Opuntia* sp. |
|  | *Pachycereus pecten-aboriginum* (Engelm. ex S. Watson) Britton & Rose |
|  | *Pilosocereus purpusii* (Britton & Rose) Byles & G.D. Rowley |
|  | *Selenicereus vagans* (K. Brandegee) Britton & Rose |
|  | *Stenocereus alamosensis* (J.M. Coult.) A.C. Gibson & K.E. Horak |
|  | *Stenocereus standleyi* (J.G.Ortega) Buxb. |
| **Cannabaceae** | *Aphananthe monoica* (Hemsl.) J.-F. Leroy |
|  | *Celtis iguanaea* (Jacq.) Sarg. |
| **Capparaceae** | *Crateva tapia* L. |
|  | *Cynophalla flexuosa* (L.) J. Presl |
|  | *Morisonia americana* L. |
|  | *Quadrella indica* (L.) Iltis & Cornejo |
| **Caricaceae** | *Carica papaya* L. |
| **Caryophyllanae** | *Commicarpus scandens* (L.) Standl. |
| **Celastraceae** | *Semialarium mexicanum* (Miers) Mennega |
| **Chenopodiaceae** | *Salicornia pacifica* Standl. |
|  | *Salicornia bigelovii* Torr. |
| **Chrysobalanaceae** | *Couepia polyandra* (Kunth) Rose |
| **Cleomaceae** | *Cleoserrata speciosa* (Raf.) Iltis |
|  | *Corynandra viscosa* (L.) Cochrane & Iltis |
| **Combretaceae** | *Conocarpus erectus* L. |
|  | *Laguncularia racemosa* (L.) C.F. Gaertn. |
| **Compositae** | *Cosmos sulphureus* Cav. |
|  | *Cirsium rhaphilepis* (Hemsl.) Petr. |
|  | *Eclipta prostrata* (L.) L. |
|  | *Mikania cordifolia* (L. f.) Willd. |
|  | *Pectis multiflosculosa* (DC.) Sch. Bip. |
|  | *Pluchea odorata* (L.) Cass. |
|  | *Porophyllum punctatum* (Mill.) S.F. Blake |
|  | *Tridax procumbens* L. |
| **Connaraceae** | *Rourea glabra* Kunth |
| **Convolvulaceae** | *Cuscuta* sp. |
|  | *Jacquemontia* sp. |
|  | *Ipomoea arborescens* (Humb. & Bonpl. Ex Willd.) G. Don. |
|  | *Ipomoea bracteata* Cav. |
|  | *Ipomoea pedicellaris* Benth. |
|  | *Ipomoea pes-caprae* (L.) R. Br. |
|  | *Ipomoea quamoclit* L. |
|  | *Merremia aegyptia* (L.) Urb. |
|  | *Merremia quinquefolia* (L.) Hallier f. |
|  | *Merremia umbellata* (L.) Hallier f. |
|  | *Operculina pteripes* (G. Don) O'Donell |
| **Cucurbitaceae** | *Momordica charantia* L. |
| **Ebenaceae** | *Diospyros salicifolia* Humb. & Bonpl. ex Willd. |
|  | *Diospyros sphaerantha* Standl. |
| **Erythroxylaceae** | *Erythroxylum havanense* Jacq. |
| **Euphorbiaceae** | *Enriquebeltrania disjuncta* De-Nova & V. Sosa |
|  | *Euphorbia heterophylla* L. |
|  | *Euphorbia hirta* L. |
|  | *Euphorbia hyssopifolia* L. |
|  | *Euphorbia schlechtendalii* Boiss. |
|  | *Euphorbia thymifolia* L. |
|  | *Croton* sp. |
|  | *Hura polyandra* Baill. |
|  | *Jatropha curcas* L. |
|  | *Jatropha sympetala* S.F. Blake & Standl. |
|  | *Manihot aesculifolia* (Kunth) Pohl |
|  | *Ricinus communis* L. |
|  | *Sapium glandulosum* (L.) Morong |
|  | *Sebastiania pavoniana* (Müll. Arg.) Müll. Arg. |
| **Fabaceae** | *Acacia farnesiana* (L.) Wild. |
|  | *Acacia cochliacantha* Humb. & Bonpl. ex Willd. |
|  | *Acacia hindsii* Benth. |
|  | *Acacia pennatula* (Schltdl. & Cham.) Benth. |
|  | *Acacia riparia* Kunth |
|  | *Aeschynomene rudis* Benth. |
|  | *Albizia lebbeck* (L.) Benth. |
|  | *Albizia occidentalis* Brandegee var. o*ccidentalis* |
|  | *Albizia tomentosa* (Micheli) Standl. |
|  | *Bauhinia ungulata* L. |
|  | *Calliandra tergemina* (L.) Benth. |
|  | *Cassia fistula* L. |
|  | *Caesalpinia pulcherrima* (L.) Sw. |
|  | *Canavalia rosea* (Sw.) DC. |
|  | *Chamaecrista nictitans* (L.) Moench |
|  | *Chamaecrista rotundifolia* (Pers.) Greene |
|  | *Coulteria platyloba* (S. Watson) N. Zamora |
|  | *Delonix regia* (Bojer ex Hook.) Raf. |
|  | *Entada polystachya* (L.) DC. |
|  | *Enterolobium cyclocarpum* (Jacq.) Griseb. |
|  | *Erythrina flabelliformis* Kearney |
|  | *Erythrina lanata* Rose |
|  | *Gliricidia sepium* (Jacq.) Kunth ex Walp. |
|  | *Guilandina bonduc* L. |
|  | *Haematoxylum brasiletto* H. Karst. |
|  | *Indigofera suffruticosa* Mill. |
|  | *Leucaena lanceolata* S. Watson |
|  | *Leucaena leucocephala* (Lam.) de Wit |
|  | *Libidibia sclerocarpa* (Standl.) Britton & Rose |
|  | *Lonchocarpus mutans* M. Sousa |
|  | *Lonchocarpus sericeus* subsp. *palmeri* (Rose)M. Sousa |
|  | *Lysiloma divaricatum* (Jacq.) J.F. Macbr. |
|  | *Macroptilium atropurpureum* (DC.) Urb. |
|  | *Macroptilium gibbosifolium* (Ortega) A. Delgado |
|  | *Microlobius foetidus* (Jacq.) M. Sousa & G. Andrade |
|  | *Mimosa distachya* Cav. |
|  | *Mimosa pigra* L. |
|  | *Neptunia plena* (L.) Benth. |
|  | *Piptadenia obliqua* (Pers.) J.F. Macbr. |
|  | *Pithecellobium dulce* (Roxb.) Benth. |
|  | *Pithecellobium lanceolatum* (Humb. & Bonpl. ex Willd.) Benth. |
|  | *Poincianella eriostachys* (Benth.) Britton & Rose |
|  | *Prosopis juliflora* (Sw.) DC. |
|  | *Rhynchosia precatoria* (Humb. & Bonpl. ex Willd.) DC. |
|  | *Senna alata* (L.) Roxb. |
|  | *Senna fruticosa* (Mill.) H.S. Irwin & Barneby |
|  | *Senna hirsuta* (L.) H.S. Irwin & Barneby |
|  | *Sesbania herbacea* (Mill.) McVaugh |
|  | *Tephrosia cinerea* (L.) Pers. |
|  | *Vigna adenantha* (G. Mey.) Marechal, Mascherpa & Stainier |
|  | *Vigna vexillata* (L.) A. Rich. |
| **Lamiaceae** | *Vitex mollis* Kunth |
| **Malvaceae** | *Anoda acerifolia* Cav. |
|  | *Ayenia* sp. |
|  | *Ceiba aesculifolia* (Kunth) Britten & Baker f. |
|  | *Ceiba pentandra* (L.) Gaerth. |
|  | *Gaya minutiflora* Rose |
|  | *Gossypium hirsutum* L. |
|  | *Guazuma ulmifolia* Lam. |
|  | *Kosteletzkya depressa* (L.) O.J. Blanch., Fryxell & D.M. Bates |
|  | *Luehea candida* (DC.) Mart. |
|  | *Malachra alceifolia* Jacq. |
|  | *Malvaviscus arboreus* Cav. |
|  | *Sida sp.* |
|  | *Hibiscus tiliaceus* L. |
|  | *Triumfetta semitriloba* Jacq. |
|  | *Waltheria indica* L. |
| **Marantaceae** | *Thalia geniculata* L. |
| **Martyniaceae** | *Martynia annua* L. |
| **Meliaceae** | *Azadirachta indica* A. Juss. |
|  | *Cedrela odorata* L. |
|  | *Swietenia humilis* Zucc. |
| **Menispermaceae** | *Cocculus diversifolius* DC. |
| **Moraceae** | *Ficus cotinifolia* Kunth |
|  | *Ficus crocata* (Miq.) Miq. |
|  | *Ficus insipida* Willd. |
|  | *Ficus involuta* (Liebm.) Miq. |
|  | *Ficus obtusifolia* Kunth |
|  | *Ficus padifolia* Kunth |
|  | *Ficus petiolaris* Kunthsubsp. *petiolaris* |
| **Myrtaceae** | *Eugenia acapulcensis* Steud. |
|  | *Psidium guajava* L. |
| **Nyctaginaceae** | *Abronia maritima* Nutt. ex S. Watson |
|  | *Boerhavia coccinea* Mill. |
|  | *Okenia hypogaea* Schltdl. & Cham. |
|  | *Pisonia capitata* (S. Watson) Standl. |
| **Nymphaeaceae** | *Nymphaea elegans* Hook. |
| **Ochnaceae** | *Ouratea mexicana* (Bonpl.) Engl. |
| **Onagraceae** | *Ludwigia octovalvis* (Jacq.) P.H. Raven |
| **Oxalidaceae** | *Oxalis frutescens* L. |
| **Opiliaceae** | *Agonandra racemosa* (DC.) Standl. |
| **Papaveraceae** | *Argemone mexicana* L. |
| **Passifloraceae** | *Passiflora* sp.1 |
|  | *Passiflora* sp.2 |
| **Phyllanthaceae** | *Phyllanthus* sp.1 |
| **Phytolaccaceae** | *Rivina humilis* L. |
|  | *Petiveria alliacea* L. |
| **Plantaginaceae** | *Scoparia dulcis* L. |
|  | *Bacopa monnieri* (L.) Wettst. |
| **Polygonaceae** | *Antigonon leptopus* Hook. & Arn. |
|  | *Coccoloba barbadensis* Jacq. |
| **Portulacaceae** | *Portulaca oleracea* L. |
| **Primulaceae** | *Bonellia macrocarpa* subsp. pungens (A. Gray) B. Ståhl & Källersjö |
| **Rhamnaceae** | *Ziziphus amole* (Sessé & Moc.) M.C. Johnst. |
| **Rhizophoraceae** | *Rhizophora mangle* L. |
| **Rubiaceae** | *Chiococca alba* (L.) Hitchc. |
|  | *Diodella crassifolia* (Benth.) Borhidi |
|  | *Diodia teres* Walter |
|  | *Exostema mexicanum* A. Gray |
|  | *Guettarda elliptica* Sw. |
|  | *Hamelia patens* Jacq. |
|  | *Hamelia versicolor* A. Gray. |
|  | *Hintonia latiflora* (DC.) Bullock |
|  | *Randia aculeata* L. |
|  | *Randia armata* (Sw.) DC. |
|  | *Randia echinocarpa* DC. |
|  | *Randia laetevirens* Standl. |
|  | *Spermacoce* sp. |
| **Rutaceae** | *Zanthoxylum caribaeum* Lam. |
|  | *Zanthoxylum fagara* (L.) Sarg. |
| **Salicaceae** | *Casearia nitida* Jacq. |
|  | *Casearia sylvestris* Sw. |
|  | *Salix nigra* Marshall |
| **Santalaceae** | *Phoradendron quadrangulare* (Kunth) Griseb. |
| **Sapindaceae** | *Cupania dentata* DC. |
|  | *Paullinia sessiliflora* Radlk. |
|  | *Sapindus saponaria* L. |
|  | *Thouinidium decandrum* (Bonpl.) Radlk. |
| **Sapotaceae** | *Sideroxylon capiri* (A.DC.) Pittier |
|  | *Sideroxylon obtusifolium* (Humb. ex Roem. & Schult.) T.D. Penn. |
|  | *Sideroxylon persimile subsp. subsessiliflorum* (Hemsl.) T.D. Penn. |
| **Smilacaceae** | *Smilax* sp. |
| **Solanaceae** | *Datura discolor* Bernh. |
|  | *Physalis pubescens* L. |
|  | *Solanum nigrescens* M. Martens & Galeotti |
|  | *Solanum torvum* Sw. |
| **Verbenaceae** | *Citharexylum affine* D. Don |
|  | *Lantana camara* L. |
|  | *Lantana trifolia* L. |
|  | *Phyla nodiflora* (L.) Greene |
| **Violaceae** | *Ixchelia mexicana* (Ging.) H.E. Ballard & Wahlert |
| **Vitaceae** | *Cissus verticillata* (L.) Nicolson & C.E.Jarvis |
